# Supplementary material
Source: Springer Nature journal article supplement (https://www.springermedizin.de/resource/supplementary/13030_2010_65_MOESM2_ESM.pdf/9644704)

Job control

Low

Passive  
group

High-strain  
group

High

Low-strain  
group

Active  
group

Low

High

Job demands

Risk of  
psychosomatic  
symptoms

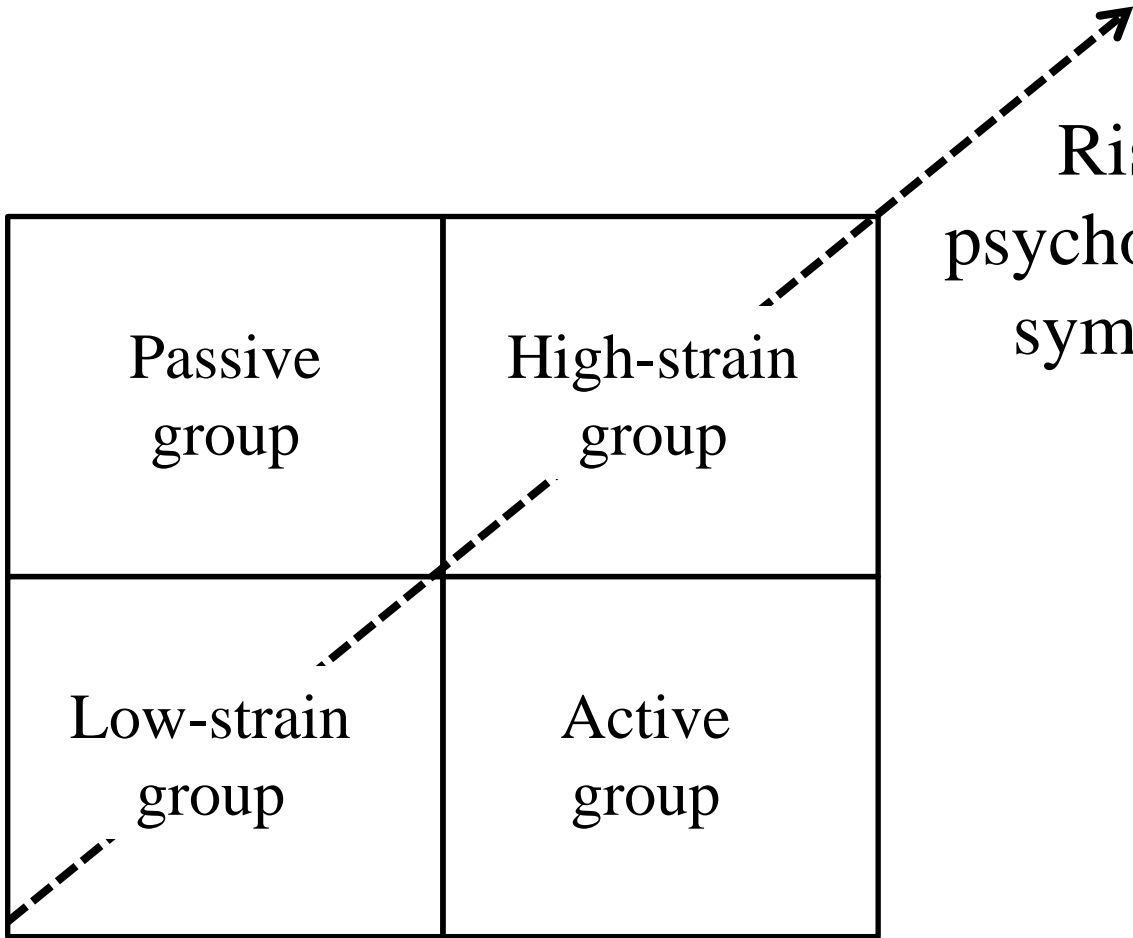

Supplement: MOESM2 [file 9644704]
